# Supplementary material
Source: PubMed Central journal article supplement (PMC6072263)
Supplement: NIHMS942477-supplement-Supplemental_Material.pdf [file NIHMS942477-supplement-Supplemental_Material.pdf]

## SUPPLEMENTAL MATERIAL

### Supplemental Figure 1. Flowchart of participants and cognitive test scores for analysis

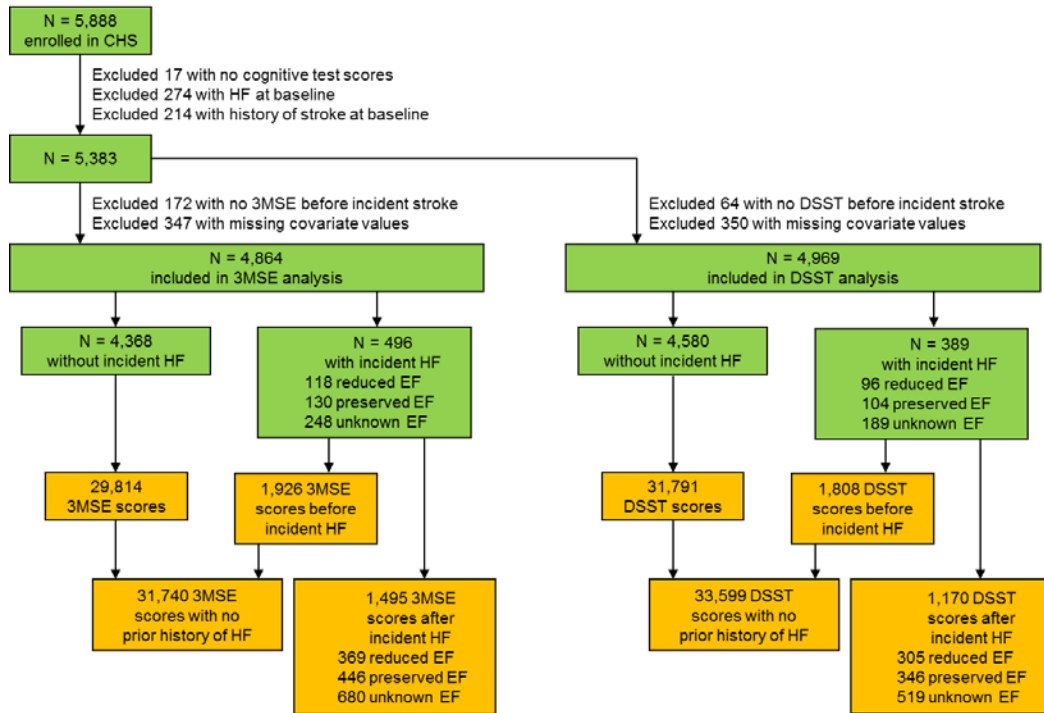

#### Summary of cognitive test scores not obtained or not analyzed due to censoring or missed exams during follow-up:

|                                                       | 3MSE analysis (n = 4,864 participants included) |                        |                   | DSST analysis (n = 4,969 participants included) |                        |                   |
|-------------------------------------------------------|-------------------------------------------------|------------------------|-------------------|-------------------------------------------------|------------------------|-------------------|
|                                                       | Overall                                         | No prior history of HF | After incident HF | Overall                                         | No prior history of HF | After incident HF |
| Number of potential scores if there were no censoring | 36,759 (100%)                                   | 34,854 (100%)          | 1,905 (100%)      | 41,348 (100%)                                   | 39,400 (100%)          | 1,948 (100%)      |
| Scores obtained and analyzed                          | 34,854 (90.4%)                                  | 31,740 (91.1%)         | 1,495 (78.5%)     | 34,769 (84.1%)                                  | 33,599 (85.3%)         | 1,170 (60.1%)     |
| Scores not obtained                                   |                                                 |                        |                   |                                                 |                        |                   |
| Censoring: death                                      | 4 (0.0%)                                        | 4 (0.0%)               | 0 (0.0%)          | 4 (0.0%)                                        | 4 (0.0%)               | 0 (0.0%)          |
| Censoring: dropout                                    | 965 (2.6%)                                      | 825 (2.4%)             | 140 (7.3%)        | 4,389 (10.6%)                                   | 3,823 (9.7%)           | 566 (29.1%)       |
| Intermittently missed exam                            | 1,682 (4.6%)                                    | 1,555 (4.5%)           | 127 (6.7%)        | 1,403 (3.4%)                                    | 1,306 (3.3%)           | 97 (5.0%)         |
| Scores obtained; not analyzed                         |                                                 |                        |                   |                                                 |                        |                   |
| Censoring: incident stroke                            | 873 (2.4%)                                      | 730 (2.1%)             | 143 (7.5%)        | 783 (1.9%)                                      | 668 (1.7%)             | 115 (5.9%)        |

Abbreviations: 3MSE = Modified Mini-Mental State Examination; CHS = Cardiovascular Health Study; DSST = Digit Symbol Substitution Test; EF = ejection fraction; HF = heart failure.

Participants with only one cognitive assessment: Of 4,864 participants included in the 3MSE analysis, 215 (4%) contributed only one 3MSE score to the analysis. Of 4,969 participants included in the DSST analysis, 293 (6%) contributed only one DSST score to the analysis.

Missing covariate values: In the 3MSE analysis, of 347 participants excluded due to missing covariate values, 183 (53%) were missing chronic obstructive pulmonary disease, another 74 (21%) were missing diabetes, and the remaining 90 (26%) were missing other covariates. In the DSST analysis, of 350 participants excluded due to missing covariate values, 188 (54%) were missing chronic obstructive pulmonary disease, another 77 (22%) were missing diabetes, and the remaining 85 (24%) were missing other covariates.

3MSE scores estimated from telephone-based cognitive assessments: In the 3MSE analysis, 1,163 3MSE scores with no prior history of HF and 163 3MSE scores after incident HF were estimated from telephone-based measures of global cognitive performance.<sup>1</sup>

**Supplemental Table 1. Characteristics at study enrollment and incident conditions by incident heart failure (HF) status for participants included in analysis of Digit Symbol Substitution Test (DSST)\***

| <b>Characteristic†</b>                                       | <b>Participants diagnosed with incident HF during follow-up<br/>(N = 389)</b> | <b>Participants not diagnosed with incident HF during follow-up<br/>(N = 4,580)</b> |
|--------------------------------------------------------------|-------------------------------------------------------------------------------|-------------------------------------------------------------------------------------|
| Age, y, mean (SD)                                            | 74.6 (5.8)                                                                    | 72.9 (5.3)                                                                          |
| Birth year, mean (SD)                                        | 1915 (5.9)                                                                    | 1917 (5.4)                                                                          |
| Male, %                                                      | 52.7                                                                          | 40.8                                                                                |
| Black race, %                                                | 9.5                                                                           | 14.0                                                                                |
| Years of education through 12 <sup>th</sup> grade, mean (SD) | 10.9 (2.0)                                                                    | 11.0 (1.9)                                                                          |
| Any education beyond 12 <sup>th</sup> grade, %               | 43.2                                                                          | 43.9                                                                                |
| Former smoking, %                                            | 44.7                                                                          | 41.6                                                                                |
| Current smoking, %                                           | 11.6                                                                          | 11.9                                                                                |
| Any current alcohol use, %                                   | 44.5                                                                          | 52.2                                                                                |
| Drinks/week, mean (SD)                                       | 4.6 (7.2)                                                                     | 5.1 (8.6)                                                                           |
| Beta-blocker use, %                                          | 18.0                                                                          | 12.2                                                                                |
| Angiotensin converting enzyme inhibitor use, %               | 6.4                                                                           | 6.1                                                                                 |
| Systolic blood pressure, mm Hg, mean (SD)                    | 140.3 (22.1)                                                                  | 135.6 (21.4)                                                                        |
| Body mass index, kg/m <sup>2</sup> , mean (SD)               | 27.5 (4.8)                                                                    | 26.5 (4.6)                                                                          |
| Chronic kidney disease, %                                    | 44.0                                                                          | 37.1                                                                                |
| Chronic obstructive pulmonary disease, %                     | 16.5                                                                          | 12.2                                                                                |
| Anemia, %                                                    | 7.5                                                                           | 7.4                                                                                 |
| Diabetes                                                     |                                                                               |                                                                                     |
| At enrollment, %                                             | 22.9                                                                          | 13.8                                                                                |
| Incident, %                                                  | 8.0                                                                           | 4.1                                                                                 |
| Hypertension                                                 |                                                                               |                                                                                     |
| At enrollment, %                                             | 64.3                                                                          | 56.4                                                                                |
| Incident, %                                                  | 22.6                                                                          | 20.8                                                                                |
| Coronary heart disease                                       |                                                                               |                                                                                     |
| At enrollment, %                                             | 32.4                                                                          | 15.5                                                                                |
| Incident, %                                                  | 31.9                                                                          | 6.7                                                                                 |
| Atrial fibrillation                                          |                                                                               |                                                                                     |
| At enrollment, %                                             | 5.1                                                                           | 1.7                                                                                 |
| Incident, %                                                  | 37.5                                                                          | 6.3                                                                                 |

\* The 4,969 participants included in this table (389 + 4,580) had at least one Digit Symbol Substitution Test (DSST) score and were included in regression models for DSST.

† All percentages in the table are column percentages. Mean drinks per week was calculated among participants who reported any current alcohol use. For diabetes, hypertension, coronary heart disease, and atrial fibrillation, percentages of participants with the condition present at enrollment and of those with the incident condition occurring during follow-up were mutually exclusive and therefore sum to the total percentage of participants with the condition either present at enrollment or occurring during follow-up (mean of 6.5 years). Incident diabetes, hypertension, coronary heart disease, or atrial fibrillation may have occurred before or after incident HF diagnosis.

**Supplemental Table 2. Coefficients and standard errors from regression models**

|                                                             | 3MSE analysis |                | DSST analysis |                |
|-------------------------------------------------------------|---------------|----------------|---------------|----------------|
|                                                             | Estimate      | Standard error | Estimate      | Standard error |
| Intercept                                                   | 74.712        | 0.660          | 14.964        | 0.959          |
| Age, per year*                                              | -0.550        | 0.026          | -0.529        | 0.019          |
| Age-squared                                                 | -0.055        | 0.003          | -0.037        | 0.002          |
| Incident HF, yes vs no                                      | -0.861        | 0.366          | -1.227        | 0.422          |
| Time since incident HF diagnosis, per year                  | -0.500        | 0.157          | -0.293        | 0.167          |
| Age × incident HF                                           | -0.034        | 0.065          | 0.004         | 0.075          |
| Age-squared × incident HF                                   | -0.002        | 0.006          | 0.009         | 0.007          |
| Age × time since incident HF diagnosis                      | -0.012        | 0.036          | 0.018         | 0.039          |
| Age-squared × time since incident HF diagnosis              | -0.004        | 0.003          | -0.004        | 0.003          |
| Birth year, per year*                                       | 0.065         | 0.032          | 0.431         | 0.035          |
| Male vs female                                              | -1.010        | 0.197          | -3.423        | 0.301          |
| Black race vs white race                                    | -4.812        | 0.273          | -8.856        | 0.432          |
| Years of education through 12 <sup>th</sup> grade, per year | 1.433         | 0.058          | 2.164         | 0.086          |
| Any education beyond 12 <sup>th</sup> grade, yes vs no      | 1.960         | 0.205          | 3.907         | 0.318          |
| Former smoking, yes vs never smoking                        | -0.053        | 0.204          | -0.166        | 0.314          |
| Current smoking, yes vs never smoking                       | -1.268        | 0.286          | -3.838        | 0.458          |
| Any current alcohol use, yes vs no                          | 0.717         | 0.205          | 2.206         | 0.316          |
| Drinks/d, per drink*                                        | 0.135         | 0.099          | 0.015         | 0.159          |
| Beta-blocker use, yes vs no                                 | 0.640         | 0.274          | 0.082         | 0.423          |
| Angiotensin converting enzyme inhibitor use, yes vs no      | 0.102         | 0.387          | -1.127        | 0.592          |
| Systolic blood pressure, per mm Hg*                         | -0.016        | 0.005          | -0.030        | 0.007          |
| Body mass index, per kg/m <sup>2</sup> *                    | -0.003        | 0.020          | -0.063        | 0.032          |
| Chronic kidney disease, yes vs no                           | 0.066         | 0.203          | 0.115         | 0.305          |
| Chronic obstructive pulmonary disease, yes vs no            | -0.300        | 0.275          | -1.230        | 0.422          |
| Anemia, yes vs no                                           | -0.674        | 0.383          | -2.542        | 0.558          |
| Diabetes, yes vs no†                                        | -0.305        | 0.215          | -1.348        | 0.267          |
| Hypertension, yes vs no†                                    | 0.233         | 0.156          | 0.186         | 0.164          |
| Coronary heart disease, yes vs no†                          | -0.359        | 0.188          | -0.522        | 0.223          |
| Atrial fibrillation, yes vs no†                             | -0.200        | 0.249          | -0.829        | 0.260          |

Abbreviations: 3MSE = Modified Mini-Mental State Examination; DSST = Digit Symbol Substitution Test; HF = heart failure.

\* Age was centered at 77 years. Birth year was centered at 1917. Systolic blood pressure was centered at 135 mm Hg. Body mass index was centered at 26.68 kg/m<sup>2</sup>. Drinks per day was drinks per week divided by 7.

† Diabetes, hypertension, coronary heart disease, and atrial fibrillation were time-varying variables, updated at the occurrence of incident diagnosis. All other variables were measured at enrollment.

**Supplemental Table 3. Characteristics of four previously published studies with follow-up longer than one year, comparing longitudinal cognitive changes in adults with heart failure versus without heart failure**

| Study                                                                                                           | Participants                                                           | Timing of cognitive assessments | Heart failure identification                                                  | Handling of prevalent and incident heart failure                                                                                                                                                                       | Exclusion of participants based on attrition during follow-up                                                                                           | Results: HF significantly associated with faster cognitive decline       | Results: HF not significantly associated with rate of cognitive decline                                                                                                                                                                              |
|-----------------------------------------------------------------------------------------------------------------|------------------------------------------------------------------------|---------------------------------|-------------------------------------------------------------------------------|------------------------------------------------------------------------------------------------------------------------------------------------------------------------------------------------------------------------|---------------------------------------------------------------------------------------------------------------------------------------------------------|--------------------------------------------------------------------------|------------------------------------------------------------------------------------------------------------------------------------------------------------------------------------------------------------------------------------------------------|
| <b>Hjelm, et al: Octogenarian Twin Study (OCTO-twin) within Swedish Twin Registry<sup>2</sup></b>               | Ages ≥ 80<br>N = 702<br>95 prevalent HF<br>96 incident HF<br>511 no HF | 5 assessments spanning 8 years  | Medical record review                                                         | Prevalent and incident HF grouped together; all cognitive test scores from incident HF cases, including those obtained before HF diagnosis, used to model cognitive trajectories in HF group                           | No participants excluded based on attrition; all available cognitive test scores used from participants who died or had missing cognitive assessments   | Short-term memory:<br>• Digit span<br>Episodic memory:<br>• Prose recall | Processing speed:<br>• Digit symbol substitution<br>• Picture matching<br>Visuospatial ability:<br>• Block design<br>Semantic memory:<br>• Information task<br>• Verbal meaning<br>Episodic memory:<br>• Picture memory<br>• Memory-in-reality       |
| <b>Alwerdt, et al: Advanced Cognitive Training for Independent and Vital Elderly Study (ACTIVE)<sup>3</sup></b> | Ages ≥ 65<br>N = 692<br>35 prevalent HF<br>37 incident HF<br>620 no HF | 6 assessments spanning 5 years  | Participant self-report of being diagnosed with HF by doctor or nurse         | Prevalent and incident HF cases analyzed as separate groups; all cognitive test scores from incident HF cases, including those obtained before HF diagnosis, used to model cognitive trajectories in incident HF group | No participants excluded based on attrition; all available cognitive test scores used from participants who died or had missing cognitive assessments   | Reasoning:<br>• Word series                                              | Processing speed:<br>• Complex reaction time<br>• Useful field of view<br>• Digit symbol substitution<br>Memory:<br>• Verbal learning<br>• Behavioral memory stories<br>• Auditory verbal learning<br>Reasoning:<br>• Letter sets<br>• Letter series |
| <b>Almeida, et al: Heart-Mind Study<sup>4</sup></b>                                                             | Ages ≥ 45<br>N = 158<br>77 prevalent HF<br>81 no HF                    | 3 assessments spanning 2 years  | Standardized protocol; only participants with LVEF < 0.4 included in HF group | Prevalent HF cases analyzed; no ascertainment of incident HF                                                                                                                                                           | No participants excluded based on attrition; all available cognitive test scores used from participants who died or had missing cognitive assessments   | Global cognitive ability:<br>• CAMCOG                                    | Processing speed:<br>• Digit copying<br>• Digit coding<br>Memory:<br>• Immediate recall<br>• Short-delayed recall<br>• Long-delayed recall                                                                                                           |
| <b>Verhaegen, et al: Berlin Aging Study (BASE)<sup>5</sup></b>                                                  | Ages ≥ 70<br>N = 196<br>101 prevalent HF<br>49 incident HF<br>46 no HF | 2 assessments spanning 4 years  | Standardized protocol                                                         | Prevalent and incident HF cases analyzed as separate groups; baseline cognitive test scores obtained before HF diagnosis used to model cognitive change scores in incident HF group                                    | Approximately 300 participants excluded who contributed baseline cognitive data but died or were lost to follow-up prior to second measurement occasion | None                                                                     | Global cognitive ability:<br>Composite of<br>• Perceptual speed<br>• Episodic memory<br>• Fluency<br>• Knowledge                                                                                                                                     |

Abbreviations: CAMCOG = Cambridge Cognitive Examination of the Elderly; HF = heart failure; LVEF = left ventricular ejection fraction.

## SUPPLEMENTAL REFERENCES

1. Arnold AM, Newman AB, Dermond N, Haan M, Fitzpatrick A. Using telephone and informant assessments to estimate missing Modified Mini-Mental State Exam scores and rates of cognitive decline. The Cardiovascular Health Study. *Neuroepidemiology*. 2009;33:55-65. doi: 10.1159/000215830.
2. Hjelm C, Dahl A, Broström A, Mårtensson J, Johansson B, Strömberg A. The influence of heart failure on longitudinal changes in cognition among individuals 80 years of age and older. *J Clin Nurs*. 2012;21:994-1003. doi: 0.1111/j.1365-2702.2011.03817.x.
3. Alwerdt J, Edwards JD, Athilingam P, O'Connor ML, Valdés EG. Longitudinal differences in cognitive functioning among older adults with and without heart failure. *J Aging Health*. 2013;25:1358-1377. doi: 10.1177/0898264313505111.
4. Almeida OP, Beer C, Lautenschlager NT, Arnolda L, Alfonso H, Flicker L. Two-year course of cognitive function and mood in adults with congestive heart failure and coronary artery disease: the Heart-Mind Study. *Int Psychogeriatr*. 2012;24:38-47. doi: 10.1017/S1041610211001657.
5. Verhaegen P, Borchelt M, Smith J. Relation between cardiovascular and metabolic disease and cognition in very old age: cross-sectional and longitudinal findings from the berlin aging study. *Health Psychol*. 2003;22:559-569. doi: 10.1037/0278-6133.22.6.559.
